# Supplementary material
Source: HighWire-hosted journal article supplement (http://www.ajnr.org/highwire/filestream/76383/field_highwire_adjunct_files/0/20-00698.pdf)
Supplement: 20-00698.pdf [file 20-00698.pdf]

**On-line Table: Cohort demographics and clinical features**

| Pt. | Age (yr) | Sex    | Lowest PaO <sub>2</sub>      | Neurologic Symptoms                                   | Time to                                                  |                                         |                                                 | CSF Results                              | Time between PaO <sub>2</sub> Nadir and MR Imaging | WM Involvement                                                                                | Current Clinical Status                                                             |
|-----|----------|--------|------------------------------|-------------------------------------------------------|----------------------------------------------------------|-----------------------------------------|-------------------------------------------------|------------------------------------------|----------------------------------------------------|-----------------------------------------------------------------------------------------------|-------------------------------------------------------------------------------------|
|     |          |        |                              |                                                       | Development of Neurologic Symptoms (Days from Admission) | Time to CT (No. of Days from Admission) | Time to MR Imaging (No. of Days from Admission) |                                          |                                                    |                                                                                               |                                                                                     |
| 1   | 64       | Male   | 62 mm Hg on admission day 12 | Obtunded                                              | 30                                                       | 30                                      | 34                                              | NA                                       | 22                                                 | Deep cerebral white matter, middle cerebellar peduncles                                       | Deceased                                                                            |
| 2   | 63       | Male   | 50 mm Hg on admission day 2  | Impaired arousal, aphasia, lethargy                   | 23                                                       | 23                                      | 30                                              | Unremarkable, no detection of SARS-CoV-2 | 28                                                 | Deep cerebral white matter, middle cerebellar peduncles, corticospinal tract, corpus callosum | Intensive care unit, intubated                                                      |
| 3   | 60       | Female | 66 mm Hg on admission day 4  | Impaired arousal                                      | 21                                                       | 21                                      | 22                                              | Unremarkable, no detection of SARS-CoV-2 | 18                                                 | Deep cerebral white matter, corticospinal tract                                               | Extubated, poor arousal, abulic, on general medicine floor                          |
| 4   | 62       | Male   | 46 mm Hg on admission day 3  | Impaired arousal, left distal lower extremity paresis | 26                                                       | NA                                      | 26                                              | NA                                       | 23                                                 | Deep cerebral white matter, middle cerebellar peduncles, corticospinal tract                  | Extubated, interactive without focal neurologic deficits, on general medicine floor |
| 5   | 76       | Female | 51 mm Hg on admission day 1  | Impaired arousal, diffuse hypertonicity               | 14                                                       | 14                                      | 14                                              | NA                                       | 13                                                 | Deep cerebral white matter, middle cerebellar peduncles                                       | Intensive care unit, intubated                                                      |
| 6   | 61       | Male   | 58 mm Hg on admission day 1  | Impaired arousal                                      | 25                                                       | 26                                      | 30                                              | NA                                       | 29                                                 | Deep cerebral white matter, middle cerebellar peduncles                                       | Intensive care unit, intubated                                                      |

**Note:**—NA indicates not applicable; Pt., patient.
